# Supplementary material for: A label-free silicon-based spherical nucleic acid enzyme (SNAzyme) for ultrasensitive chemiluminescence detection of acute myocardial infarction-related nucleic acids
Source: Royal Society of Chemistry journal article supplement (doi:10.1039/d2sd00170e), 2022-11-29
Supplement: d2sd00170e1.pdf [file d2sd00170e1.pdf]

## Supporting Information

### **A label-free silicon-based spherical nucleic acid enzyme (SNAzyme) for ultrasensitive chemiluminescence detection of acute myocardial infarction-related nucleic acids**

*Shiyang Qu<sup>a</sup>, Lin Shi<sup>a</sup>, Huan Li<sup>a</sup> and Tao Li<sup>\*a</sup>*

*<sup>a</sup> Department of Chemistry, University of Science and Technology of China, 96 Jinzhai Road, Hefei, Anhui 230026 (China). E-mail: tilitao@ustc.edu.cn.*

#### **Table of contents**

Fig. S1 Comparison of modified properties of G4 and catalytic activity between SiO<sub>2</sub> and AuNPs.

Fig. S2 Characterization of surface functionalization of SiO<sub>2</sub> by ninhydrin coloration and Fourier Transform Infrared Spectroscopy (FTIR).

Fig. S3 Optimization of SiO<sub>2</sub> modified ABEI.

Fig. S4 Modification efficiency of G4 adsorption on SiO<sub>2</sub>@ABEI.

Fig. S5 Influence of reaction time of SiO<sub>2</sub>@ABEI and G4 on DNA modification efficiency.

Fig. S6 Estimate the amount of modified G4 on the SiO<sub>2</sub>.

Fig. S7 The saturation concentration of G4 was modified by SiO<sub>2</sub>.

Fig. S8 Amino-modified DNA for linear detection of miDNA.

Fig. S9 A single base mismatch testing of the nanoprobe.

Fig. S10 Resistance to degradation of the nanoprobe tested in 1% human serum.

Table S1 Oligonucleotide sequences used in this work.

Table S2 Comparison of sensitivity for the detection of microRNAs

## Supplementary experimental section

### Preparation of SiO<sub>2</sub>-CHO, SiO<sub>2</sub>-SH, SiO<sub>2</sub>-COC

5 mg SiO<sub>2</sub>-NH<sub>2</sub> was resuspended in 3 mL of absolute ethanol, then 0.6 mL of glutaraldehyde aqueous solution (25%) was added, stirred at room temperature for 3 h, then washed with ethanol four times, and finally dried by a vacuum dryer to obtain SiO<sub>2</sub>-CHO solid powder.

2 mg SiO<sub>2</sub> was resuspended in 0.48 mL of ethanol, then 20 μL of MPTMS was added, stirred at room temperature for 1 h, washed three times with ethanol, and finally dried by a vacuum dryer to obtain SiO<sub>2</sub>-SH solid powder.

2 mg SiO<sub>2</sub> was resuspended in 2 mL of dry toluene, ultrasonically shake for 1 h to disperse, then add 20 μL of GPTMS, reflux toluene at 65°C for 1 h, then wash with dry toluene, acetone and ethanol in turn, and finally dry it in vacuum to obtain SiO<sub>2</sub>-COC solid powder, and stored at 4°C for later use.

### Preparation of SiO<sub>2</sub>@ABEI

ABEI contains an amino group, as a result, it can be immobilized on the surface of SiO<sub>2</sub> by covalent bonding.<sup>1</sup> According to literature reports, -COOH, -CHO, -COC, -SH can all interact with -NH<sub>2</sub> through covalent bonding.<sup>2-5</sup> Next, ABEI will be further modified by SiO<sub>2</sub> containing the above four groups.

1 mg SiO<sub>2</sub>-COOH was dispersed in 500 μL MES (pH 6.0, 25 mM) buffer containing 100 mM NHS, 120 mM EDC, and stirred for 1 h at room temperature, then washed sequentially with MES and PBS buffer (0.1 M, pH 7.4), and then nanoparticle was dispersed in 100 μL PBS containing 600 μM ABEI, stirred overnight at room temperature, then washed three times with water, and finally resuspended with water.

1 mg SiO<sub>2</sub>-CHO was dispersed in 100 μL PBS containing 600 μM ABEI, stirred overnight at room temperature, then washed three times with water, and finally resuspended in water.

1 mg of SiO<sub>2</sub>-COC was dispersed in 100 μL PBS containing 600 μM ABEI, stirred overnight at room temperature, then washed three times with water, and finally resuspended in water.

1 mg SiO<sub>2</sub>-SH was dispersed in 250 μL GMBS solution (3.5 mM, DMSO), stirred at room temperature for 45 min, then washed once with DMSO and PBS, and resuspended in 100 μL PBS containing 600 μM ABEI, stirred overnight at room temperature, and then washed with water three times, finally resuspend in water.

### Preparation of hemin solution

A certain amount of hemin solid was weighed and dissolved in dimethylsulfoxide (DMSO) solvent and diluted to 5 μM. For CL experiments or ABTS colorimetric experiments, the solution was diluted to the desired concentration with TE buffer.

### Screening of the optimal preparation method of SiO<sub>2</sub>@ABEI by chemiluminescence

50 μL of 2 mg/mL SiO<sub>2</sub>@ABEI (modified by various methods) was mixed with 40 μL of 500 nM G4-DNAzyme (500 nM G4+500 nM hemin), and TE buffer containing 50 mM K<sup>+</sup> was added to 200 μL, and then injected into 96 wells. Finally, 2 mM H<sub>2</sub>O<sub>2</sub> was dissolved in BR buffer of pH 12, and the CL intensity was detected by a chemiluminescence microplate reader.

### Recovery experiments

A volume of 180 μL 1% patients' serum containing 2 mg/mL SiO<sub>2</sub>-capture@ABEI nanoprobe, 50 mM MgAc<sub>2</sub> was incubated with 2 μM capture-9-G4 and five known concentrations of miDNA-499 at 37 °C for 2 h. After that, unreacted capture-9-G4 was removed by centrifugation. Then 180 μL TE buffer containing 50 mM KAc, 100 nM hemin and 2 mM MgAc<sub>2</sub> was added and incubated at 37 °C for 1 h, and then unbound hemin was removed by centrifugation. Finally, 50 μL of the reaction solution was injected into the 96-well plate, followed by 50 μL of BR Buffer containing 2 mM H<sub>2</sub>O<sub>2</sub> (pH 12). The CL intensity of the sample can be collected by BMG LABTECH, which was substituted into the miDNA-499

correction curve equation to calculate the recovery concentration of the sample. Compared with the known standard concentration, the recovery rate was calculated.

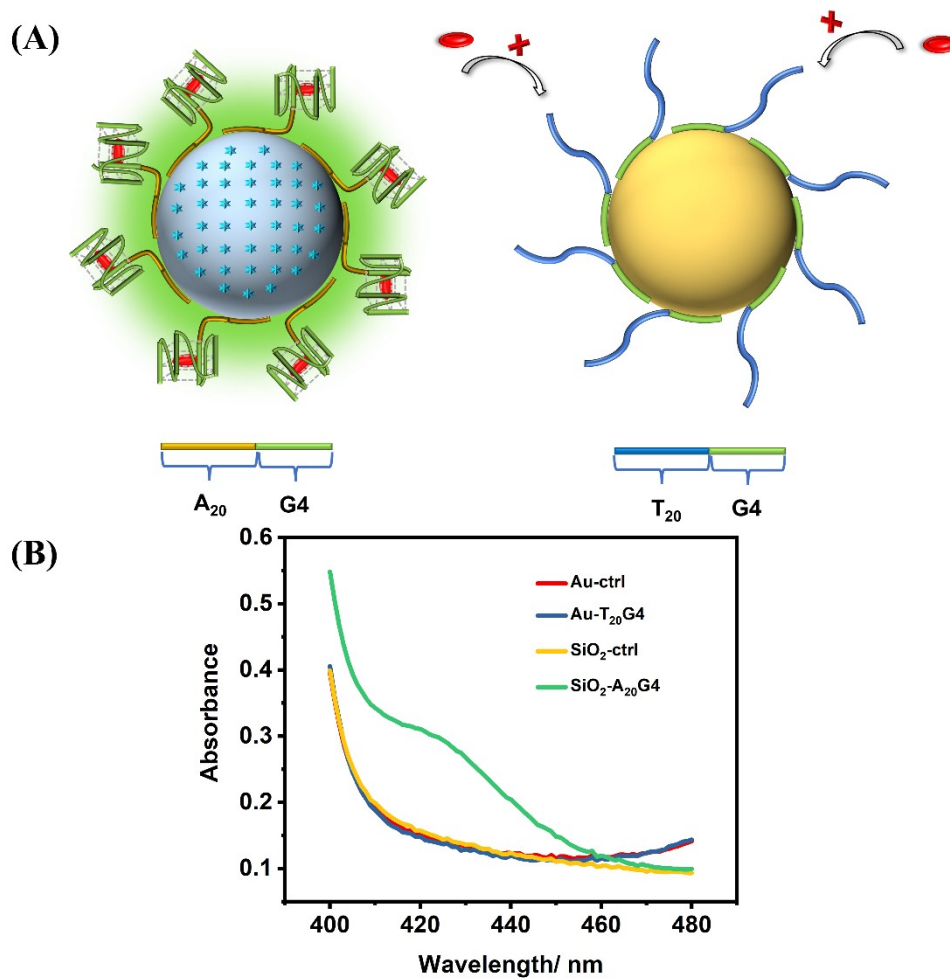

**Fig. S1** (A) Schematic diagram of SiO<sub>2</sub> and AuNPs modifying label-free G4 and forming SNAzyme respectively. (B) The catalytic activities of AuNPs-DNA and SiO<sub>2</sub>-DNA@ABEI were determined by colorimetry.

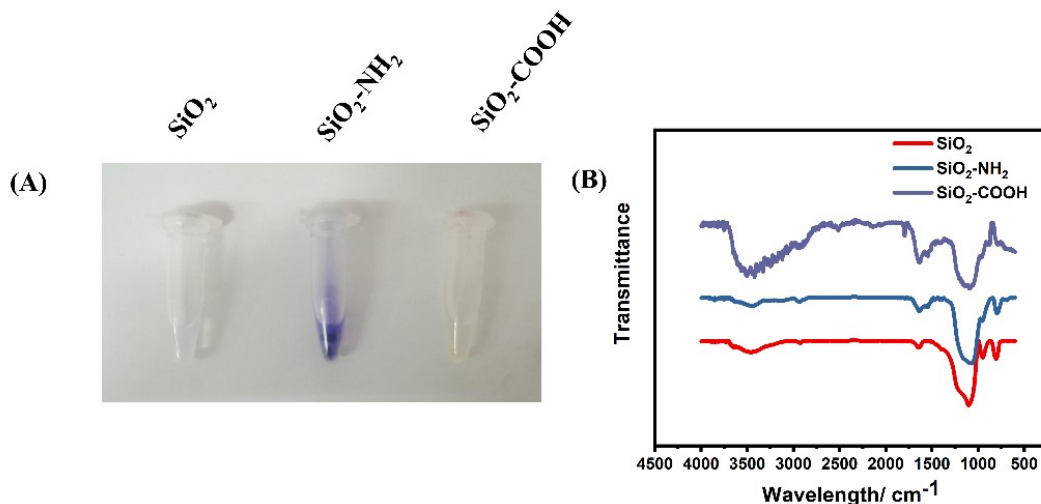

**Fig. S2** (A) The color reaction of ninhydrin and (B) FTIR spectra characterized functional amino and carboxyl groups on  $\text{SiO}_2$ .

After  $\text{SiO}_2$  is functionalized by APTES, there are a lot of amino groups on the surface, so under heating conditions, ninhydrin can react with  $\text{SiO}_2\text{-NH}_2$  to form blue compounds<sup>6</sup>. When the carboxyl group is further modified, succinic anhydride consumes a large number of amino groups, resulting in almost fading of the color (Fig. S2A). Therefore, it is simple to judge whether the two functional groups are successfully functionalized by naked eyes.

Fig. S2A shows the infrared spectra of three  $\text{SiO}_2$ . Absorption peaks appear at 808 and 1103  $\text{cm}^{-1}$  for all three types of  $\text{SiO}_2$ , and the absorption peaks are related to the symmetric and asymmetric stretching vibrations of the Si-O-Si band. The  $\text{SiO}_2\text{-NH}_2$  sample has a characteristic peak at 1560, which is attributed to the N-H bending vibration generated by the amino functional group. Meanwhile, the characteristic peak of  $\text{SiO}_2\text{-COOH}$  at 1798  $\text{cm}^{-1}$  is due to the stretching vibration of C=O ester.<sup>7,8</sup>

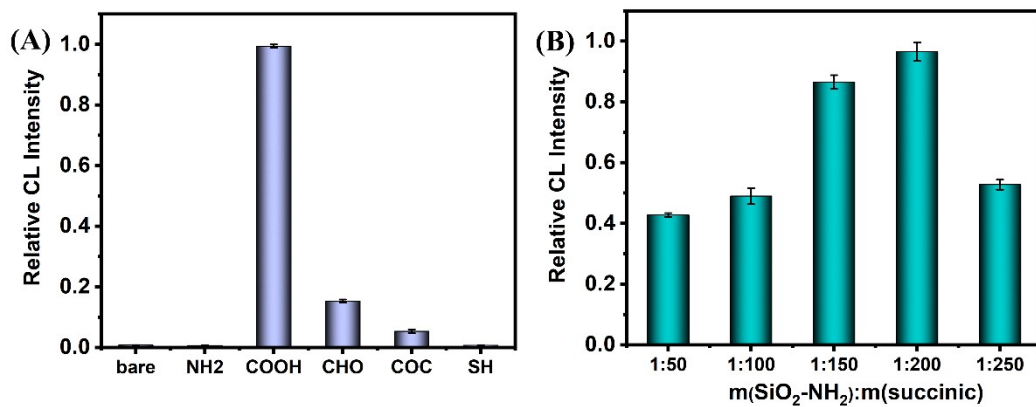

**Fig. S3** (A) CL intensity of SiO<sub>2</sub> functionalized by different functional groups loaded with ABEL. (B) CL intensity of different carboxyl modification density on SiO<sub>2</sub> surface.

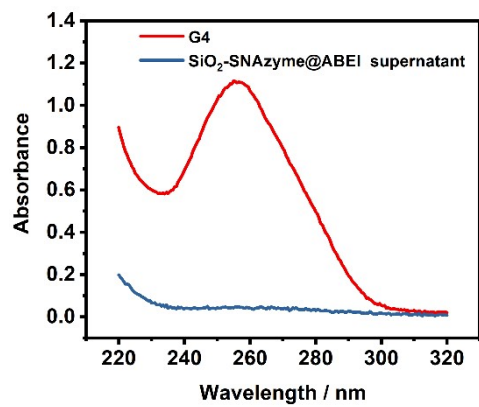

**Fig. S4** UV-vis spectra of G4 in SiO<sub>2</sub>-SNAzyme@ABEI supernatant.

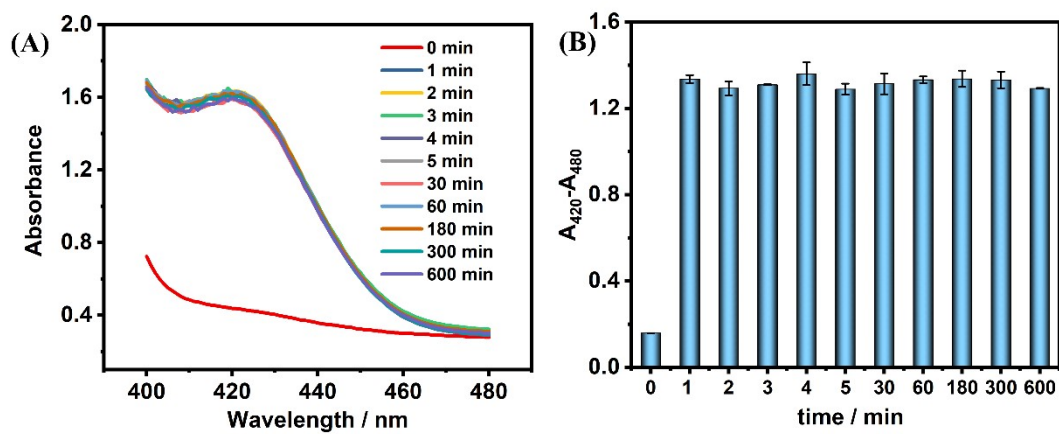

**Fig. S5** Determination of the effect of reaction time of SiO<sub>2</sub>@ABEI and G4 on DNA modification efficiency by colorimetry.(A) UV-vis spectra and (B) corresponding quantitative results for different reaction time of SiO<sub>2</sub>@ABEI and G4.



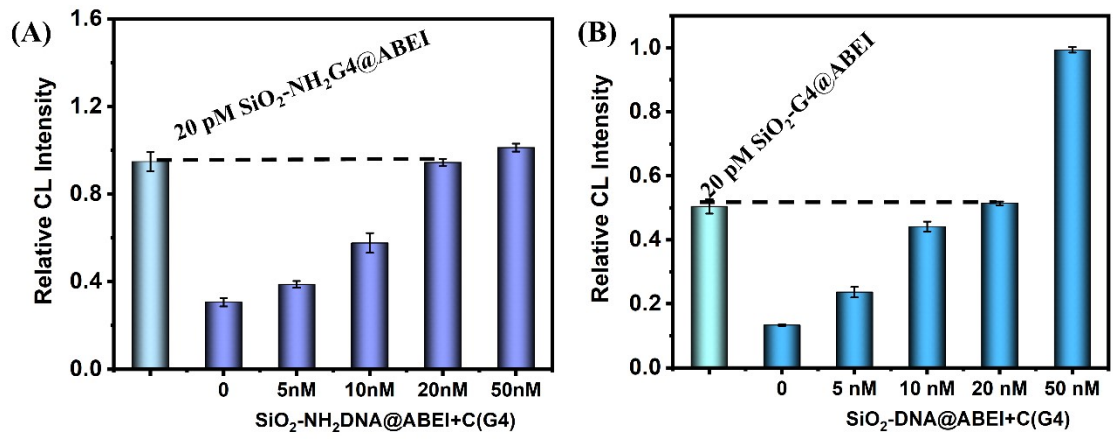

**Fig. S6** Estimate the amount of G4 modification on SiO<sub>2</sub>. (A) amino labeled G4. (B) label-free G4.

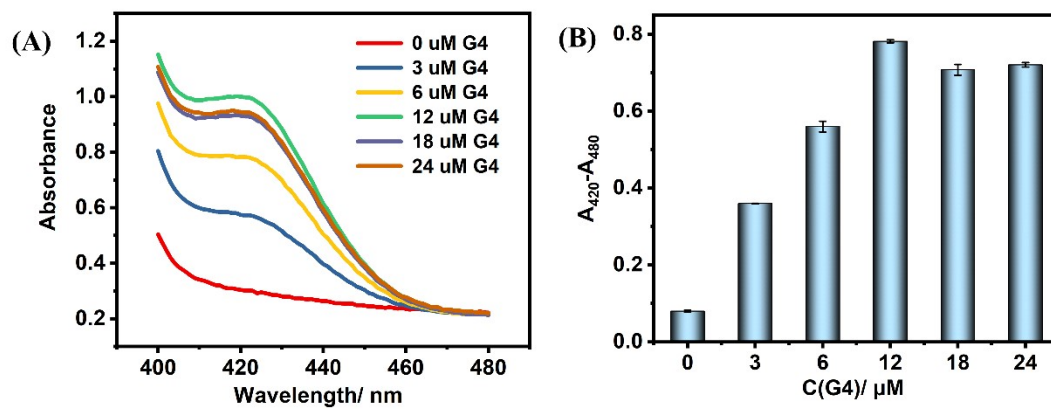

**Fig. S7** The saturation concentration of SiO<sub>2</sub> modified G4 was determined by colorimetry, (A) UV-vis spectra and (B) corresponding quantitative results for different G4 initial modification concentration.

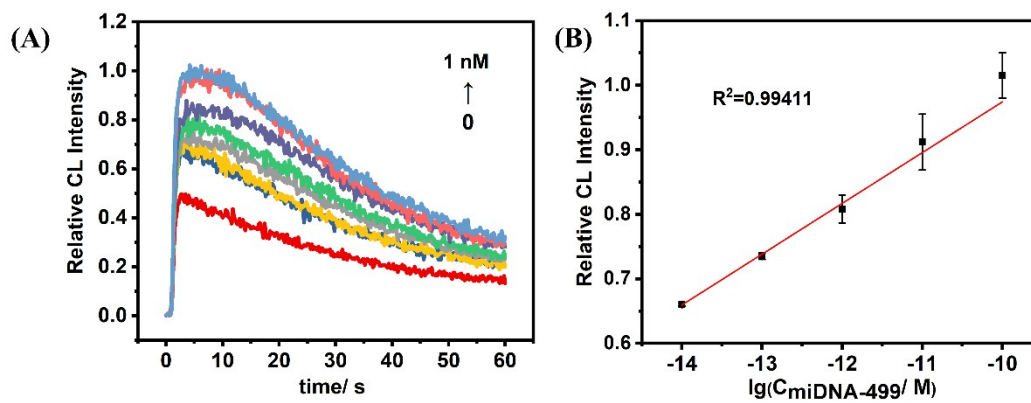

**Fig. S8** Amino labeled DNA was used for linear detection of miDNA-499. (A) Representative kinetic curves of CL responses corresponding to different concentrations of miDNA-499. (B) Calibration curve of CL responses for miDNA-499 in range of 10 fM-100 pM.

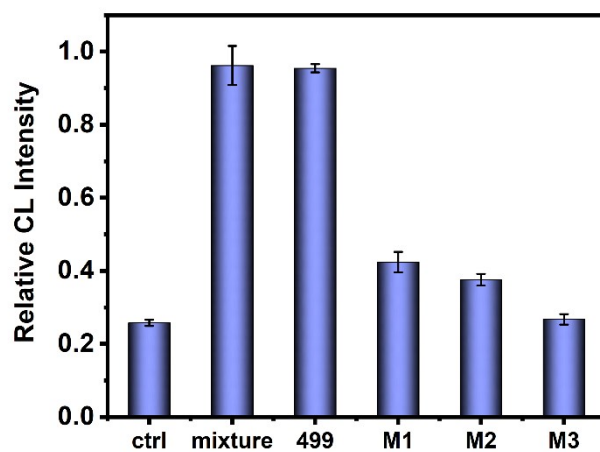

**Fig. S9** Relative CL intensity of the biosensor in the absence of samples and in the presence of miDNA-499, miDNA-499, and strands with one (M1), two (M2), three (M3) mismatched bases of miDNA-499. The concentration of miDNA-499 and miDNA-499 are both 100 pM, while that of the base mutation strands are 1 nM.

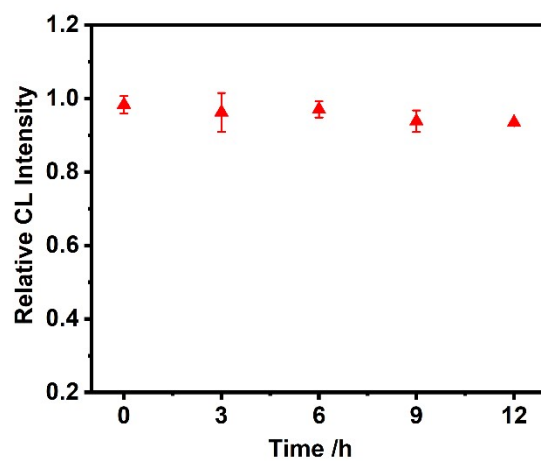

**Fig. S10** Resistance to degradation of SiO<sub>2</sub>-capture@ABEI tested in 1% human serum.

**Table S1.** Oligonucleotide sequences used in this work

| Name                                       | Sequence (5'-3')                                 |
|--------------------------------------------|--------------------------------------------------|
| NH <sub>2</sub> -SiO <sub>2</sub> -capture | AAACATCACTCAGTAACAGCGTTTTTT-NH <sub>2</sub>      |
| NH <sub>2</sub> -PW17A                     | NH <sub>2</sub> -TTTTTTTTTTGGGTAGGGCGGGTTGGGA    |
| SiO <sub>2</sub> -capture                  | AAACATCACTCAGTAACAGCGAAAAAAAAAAAAAAAAAAAAA       |
| A <sub>20</sub> -ctrl                      | AAAAAAAAAAAAAAAAAAAAATTTTCGTTTAGGATTTGTG         |
| T <sub>20</sub> -G4                        | TTTTTTTTTTTTTTTTTTTTGGGTAGGGCGGGTTGGGA           |
| C <sub>20</sub> -G4                        | CCCCCCCCCCCCCCCCCCCCGGGTAGGGCGGGTTGGGA           |
| A <sub>20</sub> -G4                        | AAAAAAAAAAAAAAAAAAAAAGGGTAGGGCGGGTTGGGA          |
| capture-6-G4                               | TTACTGGCAAGTCTTAATTTTTGGGTAGGGCGGGTTGGGA         |
| capture-7-G4                               | GTTACTGGCAAGTCTTAATTTTTGGGTAGGGCGGGTTGGGA        |
| capture-8-G4                               | TGTTACTGGCAAGTCTTAATTTTTGGGTAGGGCGGGTTGGGA       |
| capture-9-G4                               | CTGTTACTGGCAAGTCTTAATTTTTGGGTAGGGCGGGTTGGGA      |
| capture-10-G4                              | GCTGTTACTGGCAAGTCTTAATTTTTGGGTAGGGCGGGTTGGG<br>A |
| miDNA-499                                  | TTAAGACTTGCAGTGATGTTT                            |
| miDNA-499-M1                               | TTAAGACTTGTAGTGATGTTT                            |
| miDNA-499-M2                               | TTAAGAGTTGCAGAGATGTTT                            |
| miDNA-499-M3                               | TTAATACTTGTAGTGACGTTT                            |
| miDNA-133a                                 | AGCTGGTAAAATGGAACCAAAT                           |
| miDNA-208                                  | AAGCTTTTGTCTCGAATTATGT                           |
| miDNA-328                                  | CTGGCCCTCTCTGCCCTCCGT                            |

**Table S2** Comparison of sensitivity for the detection of microRNAs

| <b>Method</b>     | <b>Target</b> | <b>Linear Range</b> | <b>LOD</b> | <b>Ref.</b>     |
|-------------------|---------------|---------------------|------------|-----------------|
| chemiluminescence | miRNA-30b     | 8 pM-20 nM          | 4.5 pM     | S <sup>9</sup>  |
| chemiluminescence | miRNA-21      | 100 pM-1 nM         | 100 pM     | S <sup>10</sup> |
| ECL               | miRNA let-7a  | 10 fM-10 nM         | 1.49 fM    | S <sup>11</sup> |
| qRT-PCR           | miRNA-145     | 0.1 pg-1.0 mg       | 0.1 pg     | S <sup>12</sup> |
| SERS              | miRNA-141     | 100 fM-1 nM         | 100 fM     | S <sup>13</sup> |
| chemiluminescence | miDNA-499     | 10 fM-100 pM        | 0.8 fM     | This work       |

## References

1. W. Kong, X. Zhao, Q. Zhu, L. Gao and H. Cui, *Anal. Chem.*, 2017, **89**, 7145-7151.
2. P. Alonso-Cristobal, P. Vilela, A. El-Sagheer, E. Lopez-Cabarcos, T. Brown, O. L. Muskens, J. Rubio-Retama and A. G. Kanaras, *ACS Appl. Mater. Interfaces*, 2015, **7**, 12422-12429.
3. S. Hu, T. H. Chen, Y. Zhao, Z. Wang and R. H. W. Lam, *Langmuir*, 2018, **34**, 1750-1759.
4. Y. Li, J. Li, X. Gao, S. Qi, J. Ma and J. Zhu, *Appl. Surf. Sci.*, 2018, **462**, 362-372.
5. D. Long, Y. Tu, Y. Chai and R. Yuan, *Anal. Chem.*, 2021, **93**, 12995-13000.
6. D. B. Hansen and M. M. Joullié, *Chem. Soc. Rev.*, 2005, **34**, 408-417.
7. D. Li, W. Y. Teoh, J. J. Gooding, C. Selomulya and R. Amal, *Adv.Funct. Mater.*, 2010, **20**, 1767-1777.
8. S. Kamari and A. Shahbazi, *Chemosphere*, 2020, **243**, 125282.
9. J. Li, J. Zhao, S. Li, L. Zhang, Y. Huang, S. Zhao and Y.-M. Liu, *Chem.Commun.*, 2016, **52**, 12806-12809.
10. X. Li, H. Zhang, Y. Tang, P. Wu, S. Xu and X. Zhang, *ACS Sens.*, 2017, **2**, 810-816.
11. M.-L. Zhao, W.-J. Zeng, Y.-Q. Chai, R. Yuan and Y. Zhuo, *Anal. Chem.*, 2020, **92**, 11044-11052.
12. K. J. Kim, J. Kwak, J.-H. Lee and S. S. Lee, *Anal. Biochem.*, 2017, **536**, 32-35.
13. H. Zhang, Y. Yi, C. Zhou, G. Ying, X. Zhou, C. Fu, Y. Zhu and Y. Shen, *RSC Adv.*, 2017, **7**, 52782-52793.
